# Supplementary material for: Effects of Vildagliptin on Glucose Control Over 24 Weeks in Patients With Type 2 Diabetes Inadequately Controlled With Metformin
Source: Oxford University Press journal article supplement (doi:10.2337/dc06-1732), 2007-03-29
Supplement: dc06-1732_oa1.pdf [file dc06-1732_oa1.pdf]

Assessed for eligibility  
(N = 988)

Excluded (n = 444)  
Did not meet inclusion criteria (n = 378)  
Declined to participate (n = 31)  
Other (n = 35)

Randomized  
(N = 544)

Allocated to:  
Vilda 50 mg daily + met (n = 177)  
Primary ITT population (n = 143)

Allocated to:  
Vilda 100 mg daily + met (n = 185)  
Primary ITT population (n = 143)

Allocated to:  
Placebo + met (n = 182)  
Primary ITT population (n = 130)

Discontinued (n = 24, 13.6%)  
Adverse event (n = 8, 4.5%)  
Abnormal test result (n = 0)  
Unsatisfactory therapeutic effect (n = 5, 2.8%)  
Protocol violation (n = 1, 0.6%)  
Withdrew consent (n = 6, 3.4%)  
Lost to follow-up (n = 4, 2.3%)  
Administrative (n = 0)

Discontinued (n = 28, 15.1%)  
Adverse event (n = 7, 3.8%)  
Abnormal test result (n = 2, 1.1%)  
Unsatisfactory therapeutic effect (n = 2, 1.1%)  
Protocol violation (n = 1, 0.5%)  
Withdrew consent (n = 10, 5.4%)  
Lost to follow-up (n = 4, 2.2%)  
Administrative (n = 2, 1.1%)

Discontinued (n = 30, 16.5%)  
Adverse event (n = 4, 2.2%)  
Abnormal test result (n = 0)  
Unsatisfactory therapeutic effect (n = 9, 4.9%)  
Protocol violation (n = 1, 0.5%)  
Withdrew consent (n = 6, 3.3%)  
Lost to follow-up (n = 10, 5.5%)  
Administrative (n = 0)

Completed  
(n = 153, 86.4%)

Completed  
(n = 157, 84.9%)

Completed  
(n = 152, 83.5%)
