# Supplementary material for: Effects of Vildagliptin on Glucose Control Over 24 Weeks in Patients With Type 2 Diabetes Inadequately Controlled With Metformin
Source: Oxford University Press journal article supplement (doi:10.2337/dc06-1732), 2007-03-29

# Baseline

# Endpoint

—△— Vildagliptin 50 mg daily + metformin    —▲— Vildagliptin 100 mg daily + metformin    —○— Placebo + metformin

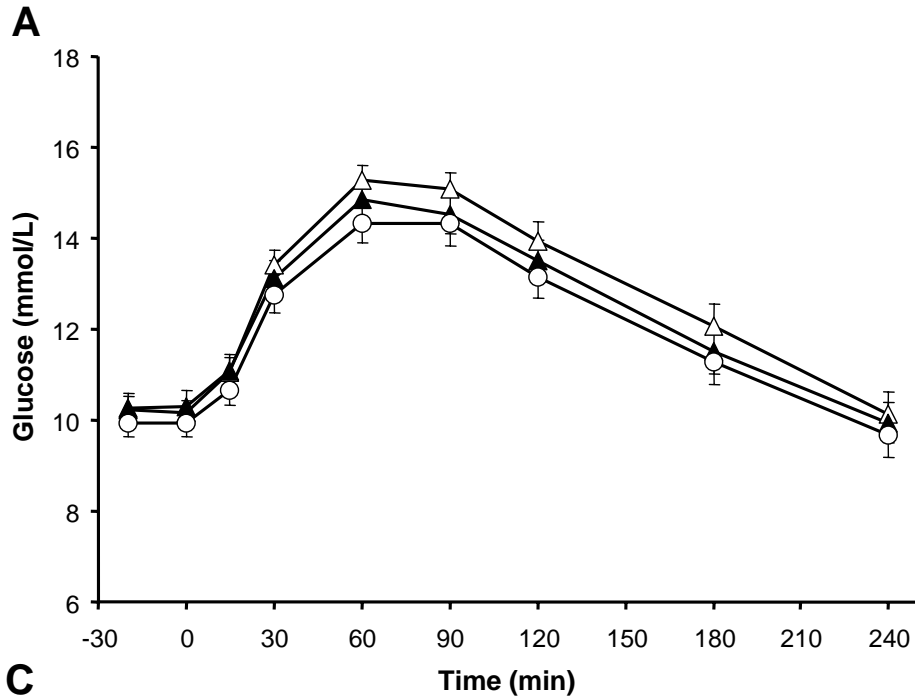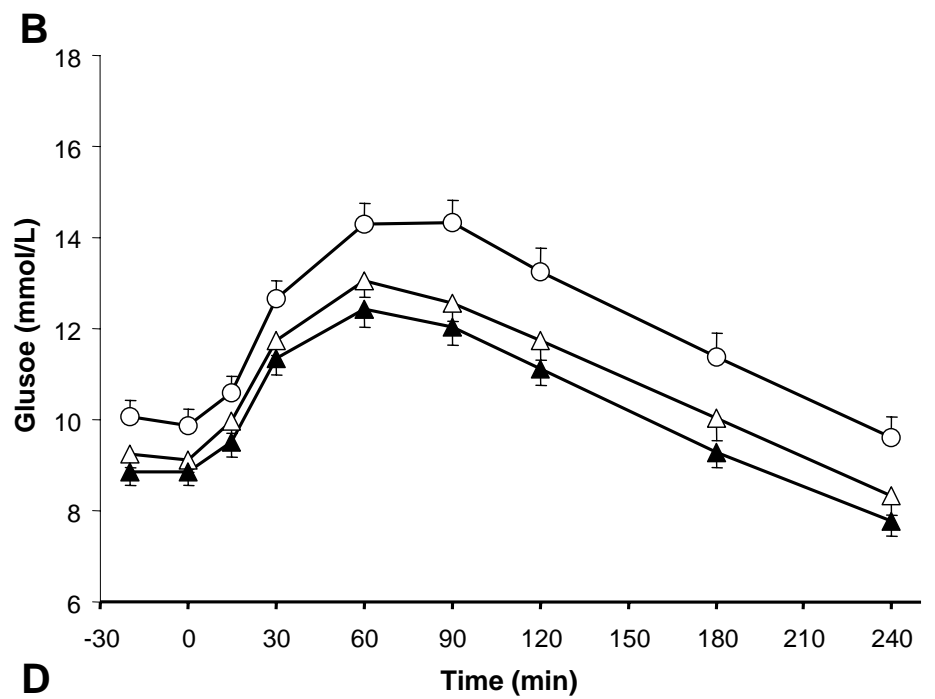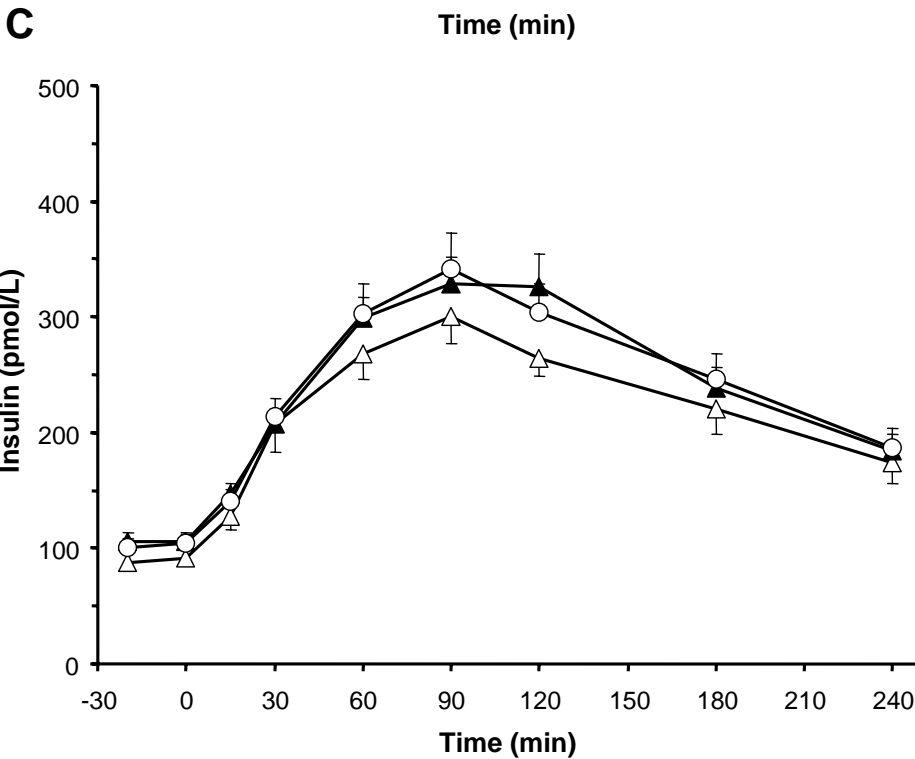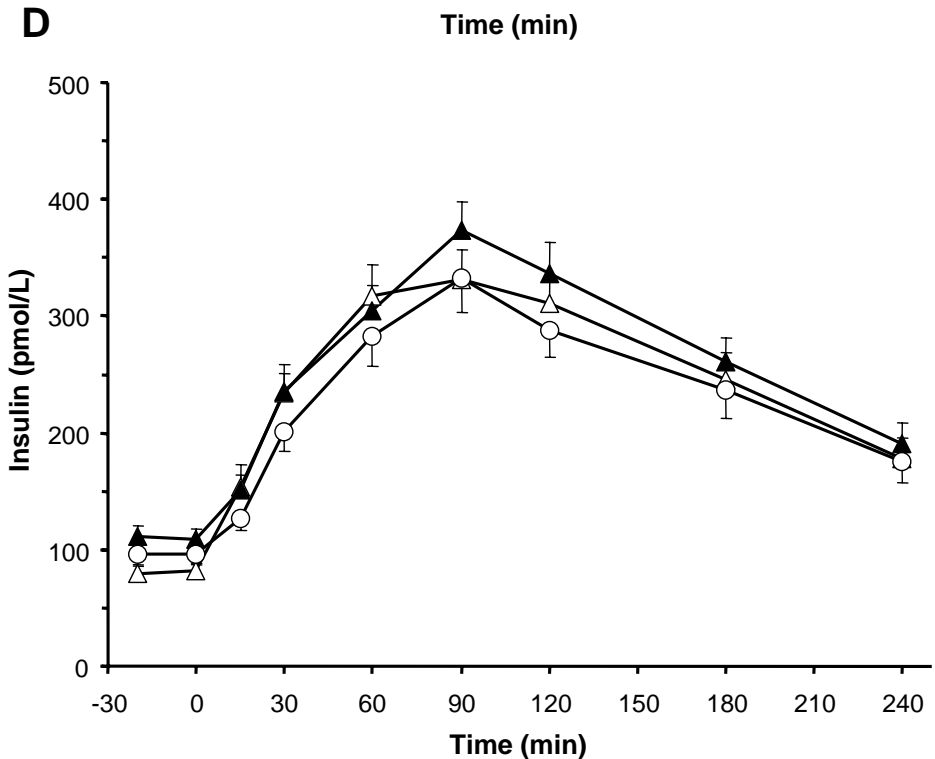

Supplement: dc06-1732_oa3.pdf [file dc06-1732_oa3.pdf]
