# Supplementary material for: Effects of Vildagliptin on Glucose Control Over 24 Weeks in Patients With Type 2 Diabetes Inadequately Controlled With Metformin
Source: Oxford University Press journal article supplement (doi:10.2337/dc06-1732), 2007-03-29
Supplement: dc06-1732_oa5t.pdf [file dc06-1732_oa5t.pdf]

**Table 1: Adverse events reported by >4% of patients in the safety population**

|                                   | <b>Vildagliptin<br/>50 mg daily<br/>(n = 177)</b> | <b>Vildagliptin<br/>100 mg daily<br/>(n = 183)</b> | <b>Placebo<br/>(n = 181)</b> |
|-----------------------------------|---------------------------------------------------|----------------------------------------------------|------------------------------|
| Any AE                            | 112 (63.3)                                        | 119 (65.0)                                         | 115 (63.5)                   |
| Any gastrointestinal AE           | 17 (9.6)*                                         | 27 (14.8)                                          | 33 (18.2)                    |
| Upper respiratory tract infection | 13 (7.3)                                          | 14 (7.7)                                           | 16 (8.8)                     |
| Dizziness                         | 7 (4.0)                                           | 11 (6.0)                                           | 7 (3.9)                      |
| Nasopharyngitis                   | 20 (11.3)                                         | 11 (6.0)                                           | 13 (7.2)                     |
| Influenza                         | 6 (3.4)                                           | 10 (5.5)                                           | 11 (6.1)                     |
| Diarrhea                          | 2 (1.1)                                           | 8 (4.4)                                            | 10 (5.5)                     |
| Nausea                            | 5 (2.8)                                           | 8 (4.4)                                            | 9 (5.0)                      |
| Pain in extremity                 | 2 (1.1)                                           | 8 (4.4)                                            | 6 (3.3)                      |
| Headache                          | 11 (6.2)                                          | 7 (3.8)                                            | 6 (3.3)                      |

\* $P < .05$  vs placebo

**Table 2:** Efficacy of other oral agents or exenatide added to metformin

| <u>Treatment added to metformin</u>   | <u>Duration of Treatment</u> | <u>Baseline HbA<sub>1c</sub></u> | <u>Mean change or *placebo-subtracted mean change</u> | <u>Reference</u> |
|---------------------------------------|------------------------------|----------------------------------|-------------------------------------------------------|------------------|
| <u>Rosiglitazone 4 mg</u>             | <u>26 weeks</u>              | <u>8.9%</u>                      | <u>-1.0%*</u>                                         | <u>(1)</u>       |
| <u>Rosiglitazone 8 mg</u>             | <u>26 weeks</u>              | <u>8.9%</u>                      | <u>-1.2%*</u>                                         | <u>(1)</u>       |
| <u>Exenatide 5 µg</u>                 | <u>30 weeks</u>              | <u>8.3%</u>                      | <u>-0.5%*</u>                                         | <u>(2)</u>       |
| <u>Exenatide 10 µg</u>                | <u>30 weeks</u>              | <u>8.2%</u>                      | <u>-0.9%*</u>                                         | <u>(2)</u>       |
| <u>Glimepiride titrated to 8 mg</u>   | <u>26 weeks</u>              | <u>8.4%</u>                      | <u>-1.3%</u>                                          | <u>(3)</u>       |
| <u>Pioglitazone titrated to 45 mg</u> | <u>26 weeks</u>              | <u>8.3%</u>                      | <u>-1.2%</u>                                          | <u>(3)</u>       |
| <u>Glibenclamide 5 mg</u>             | <u>24 weeks</u>              | <u>8.5%</u>                      | <u>-1.5%</u>                                          | <u>(4)</u>       |
| <u>Rosiglitazone 4 mg</u>             | <u>24 weeks</u>              | <u>8.4%</u>                      | <u>-1.1%</u>                                          | <u>(4)</u>       |
| <u>Glimepiride 2 mg</u>               | <u>1 year</u>                | <u>7.9%</u>                      | <u>-0.9%</u>                                          | <u>(5)</u>       |
| <u>Rosiglitazone 4 mg</u>             | <u>1 year</u>                | <u>8.0%</u>                      | <u>-1.2%</u>                                          | <u>(5)</u>       |
| <u>Pioglitazone titrated to 45 mg</u> | <u>2 years</u>               | <u>8.7%</u>                      | <u>-1.0% at 1 year, -0.9% at 2 years</u>              | <u>(6)</u>       |
| <u>Gliclazide titrated to 320 mg</u>  | <u>2 years</u>               | <u>8.5%</u>                      | <u>-1.0% at 1 year, -0.8% at 2 years</u>              | <u>(6)</u>       |

## FIGURE LEGENDS

**Figure 1:** Patient flow.

**Figure 2:** Number of patients experiencing specified changes from baseline to endpoint in HbA<sub>1c</sub>.

**Figure 3:** Plasma glucose (Panels A and B) and insulin (Panels C and D) before (Baseline, Panels A and C) and after (Endpoint, Panels B and D) 24-week treatment with vildagliptin 50 mg daily (open triangles), vildagliptin 100 mg daily (closed triangles) or placebo (open circles) in patients with T2DM continuing a stable metformin dose regimen. Patients from the primary ITT population who participated in meal tests (n = 54 to 58 patients per treatment group).

**Figure 4:** Adjusted mean change from baseline to endpoint in fasting lipid parameters (Panel A) or body weight (BW, Panel B) after 24-week treatment with vildagliptin 50 mg daily (shaded bars), vildagliptin 100 mg daily (black bars) or placebo (white bars) in patients with T2DM continuing a stable metformin dose regimen. Primary ITT population, n = 130 to 143 patients per treatment group. \*  $P < .05$ , \*\*\* $P < .001$
