# Supplementary figures and images for: Effects of Vildagliptin on Glucose Control Over 24 Weeks in Patients With Type 2 Diabetes Inadequately Controlled With Metformin
Source: Oxford University Press journal article supplement (doi:10.2337/dc06-1732), 2007-03-29

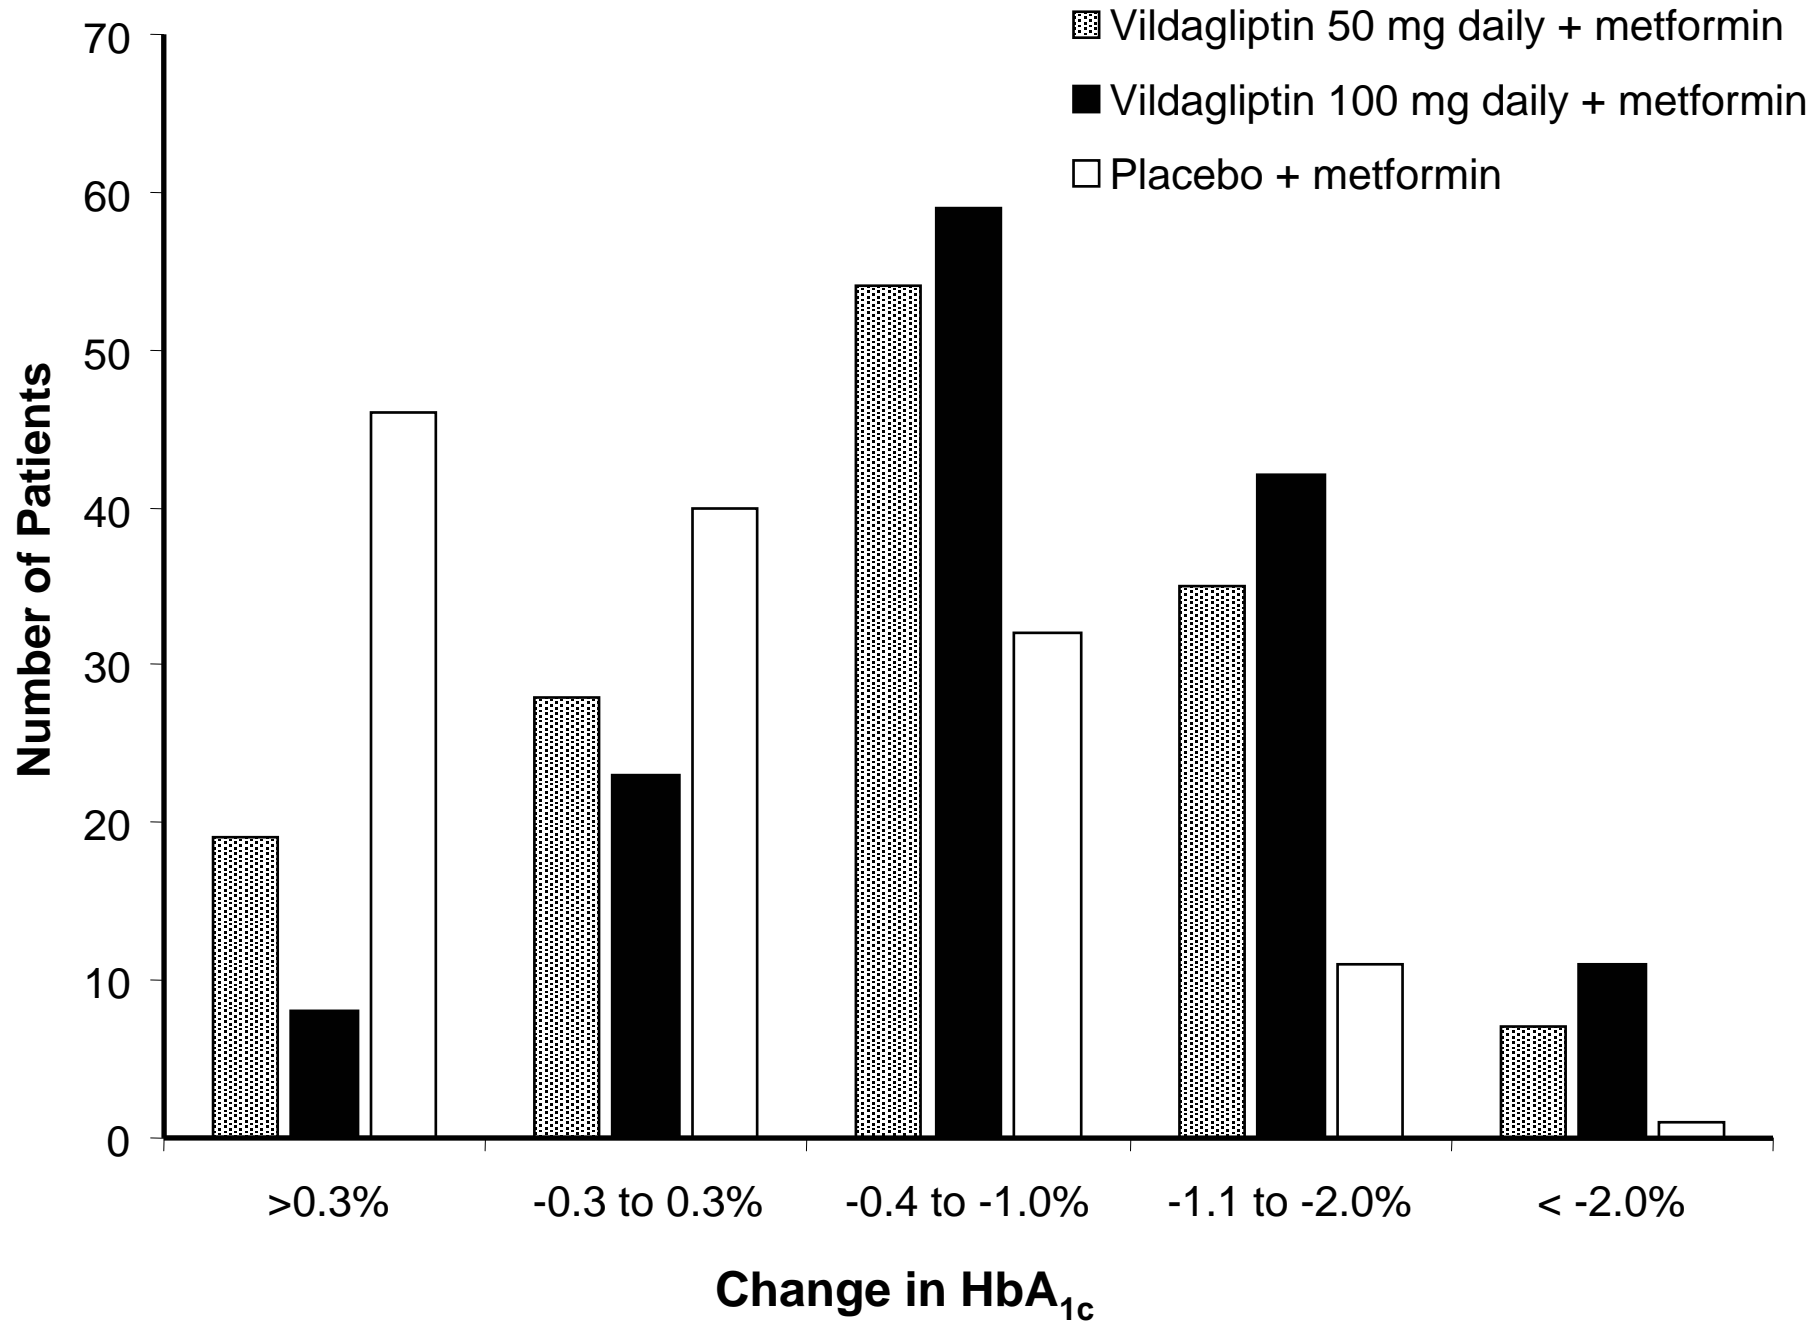

Supplement: dc06-1732_oa2.pdf [file dc06-1732_oa2.pdf]

**A**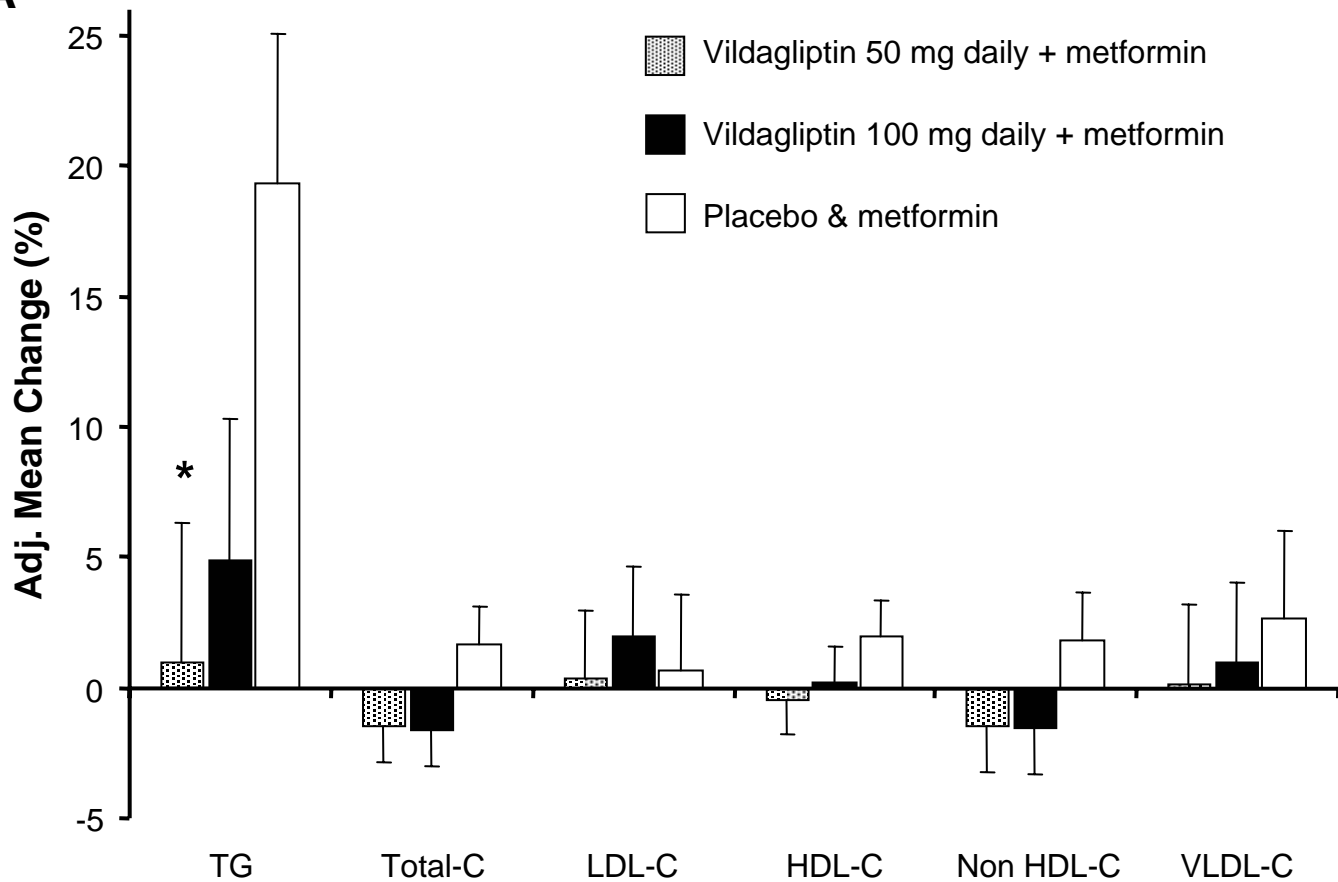**B**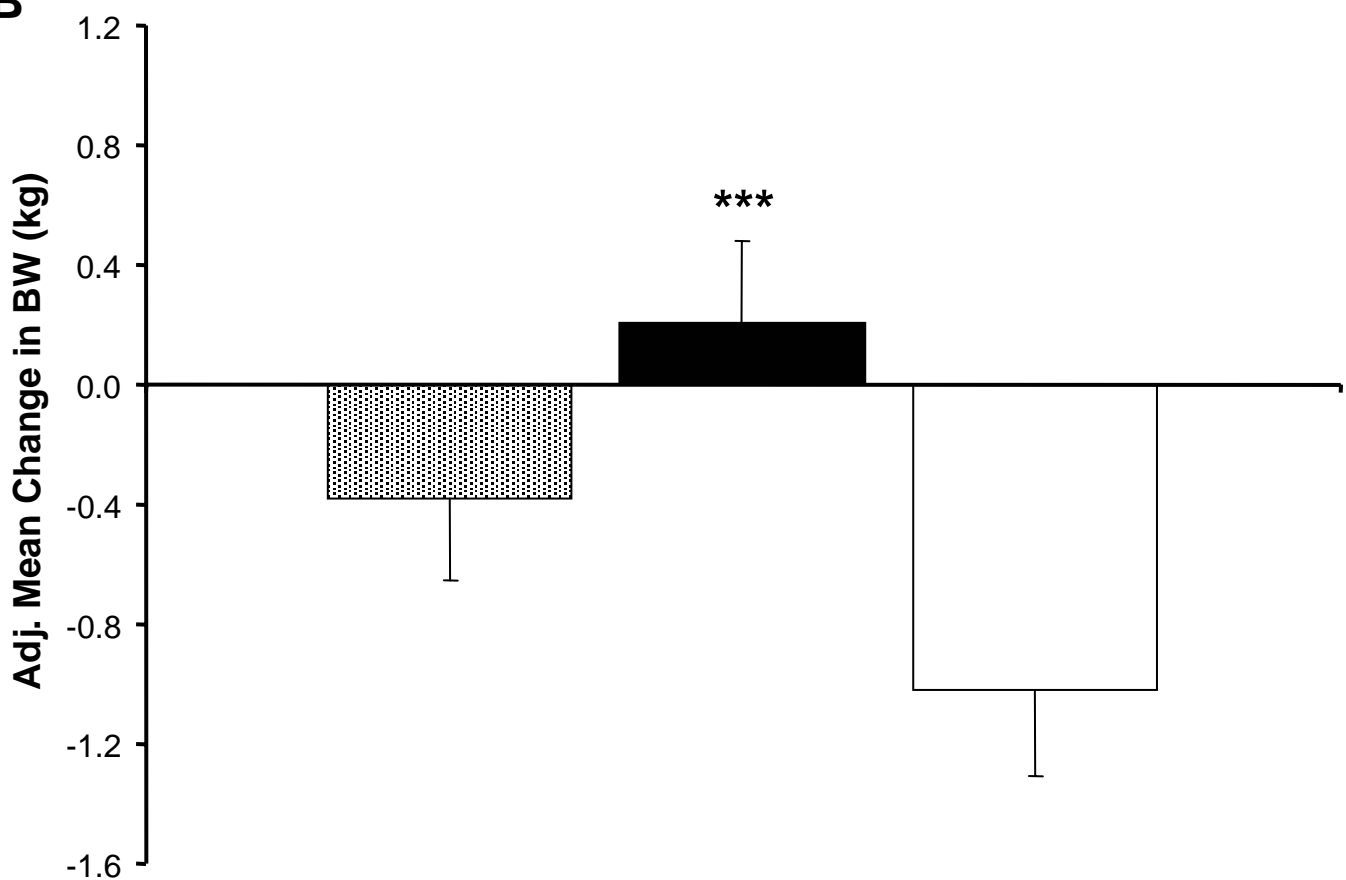

Supplement: dc06-1732_oa4.pdf [file dc06-1732_oa4.pdf]
